# Supplementary material
Source: PubMed Central journal article supplement (PMC3242665)
Supplement: mt2011206x1.pdf [file mt2011206x1.pdf]

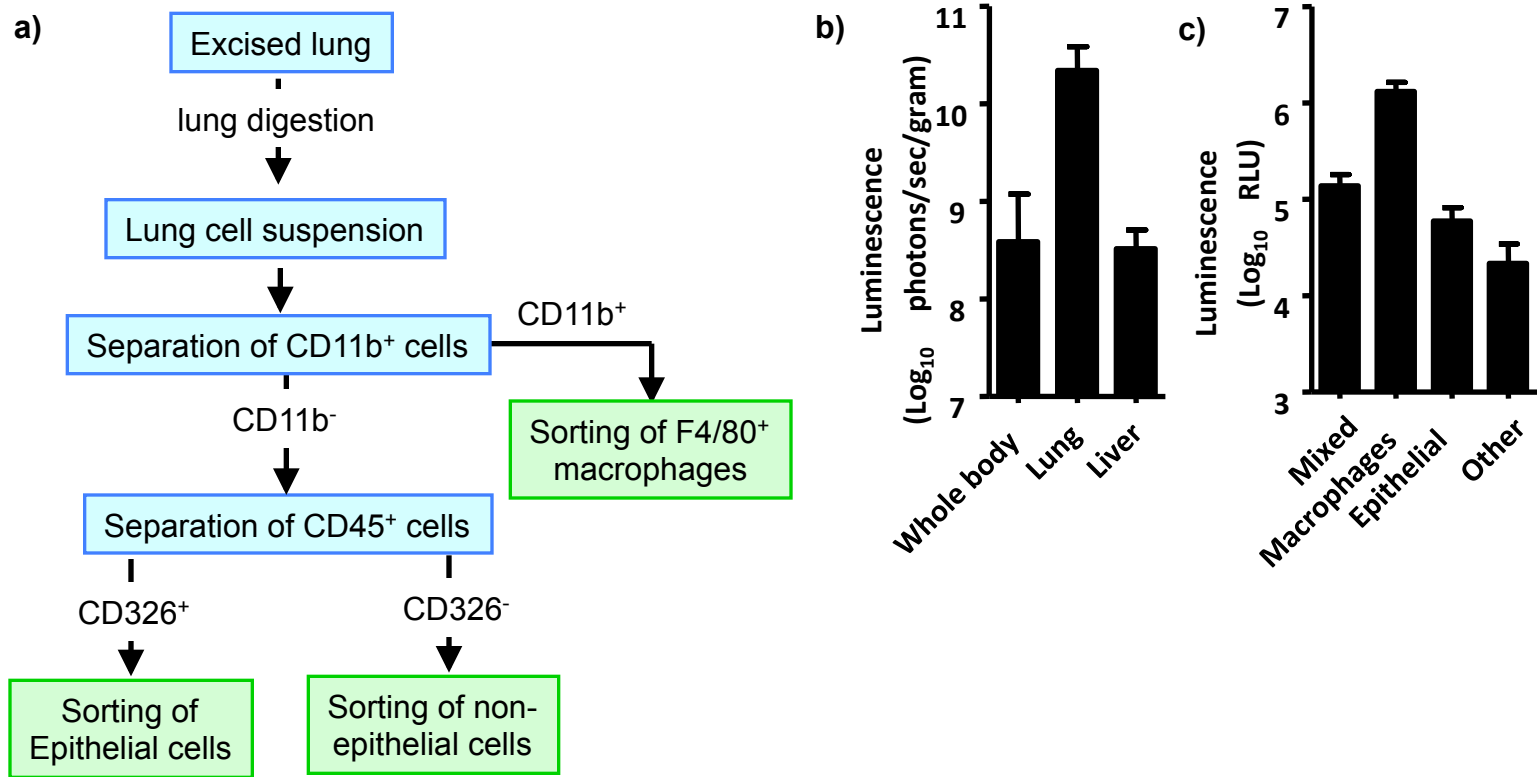

**Figure S1: Application of TDCS results in highly consistent luminescence readouts.** (a) Flow chart description of TDCS sorting method. (b) Baseline luminescence measurements after whole body, excised lung or liver bioimaging in naive mice. (c) Plate-based measurement of luminescence in TDCS preparations of mixed pneumonocytes, macrophages, epithelial cells or macrophage- and epithelial cell-depleted pneumonocyte preparations. All measurements are presented as means + SD.
