# Supplementary material
Source: PubMed Central journal article supplement (PMC3242665)
Supplement: mt2011206x3.pdf [file mt2011206x3.pdf]

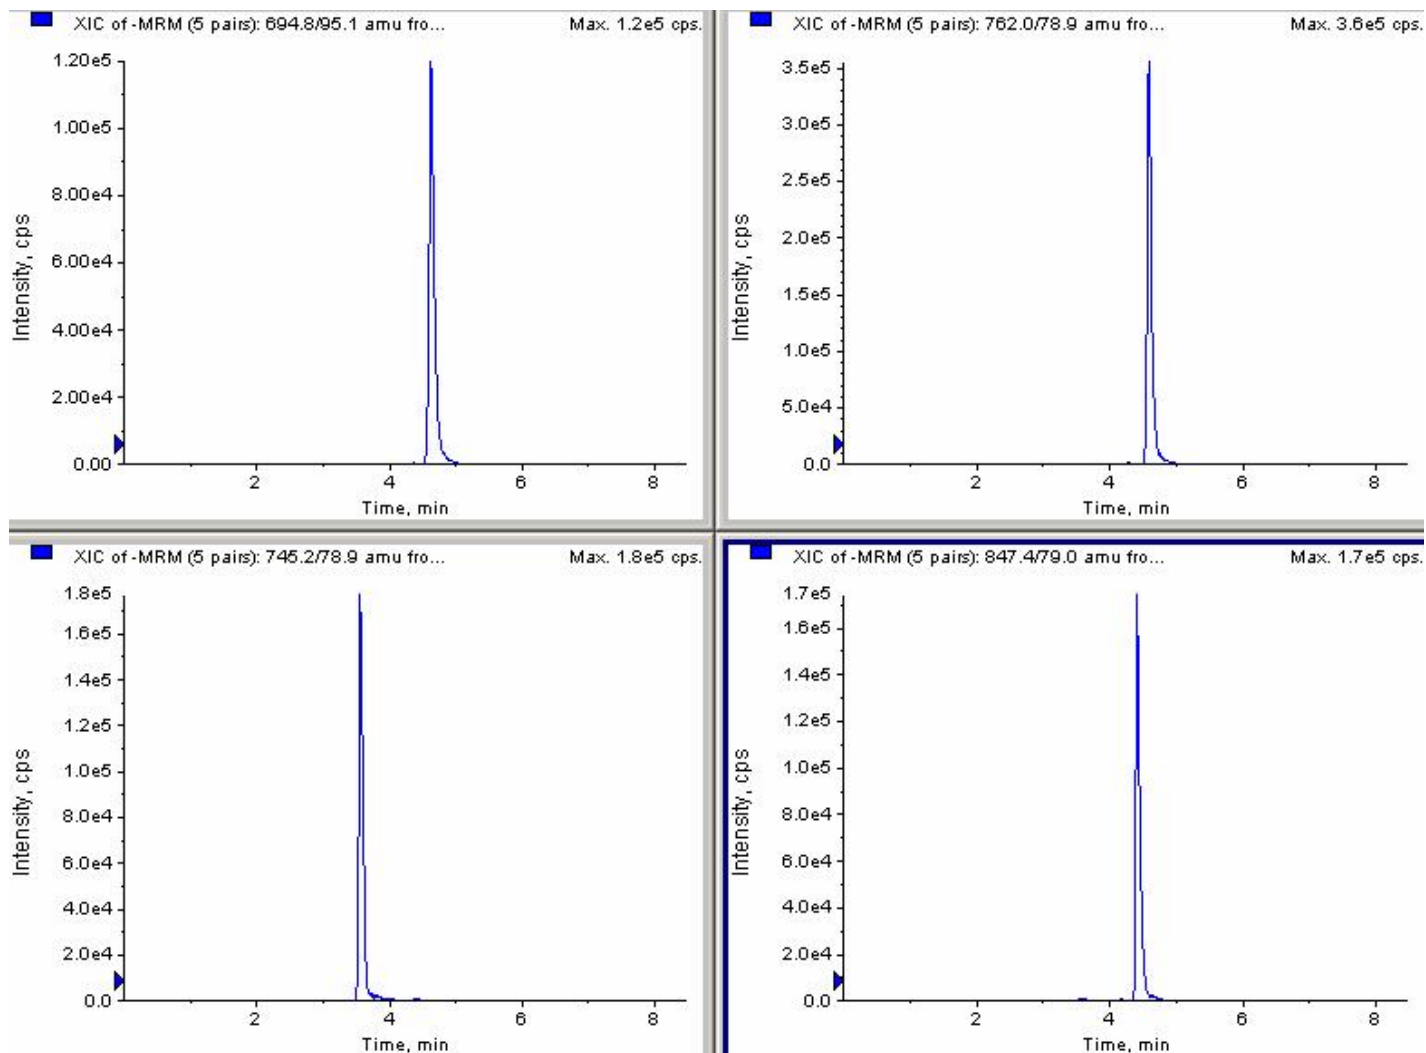

**Figure S3: Extracted ion chromatograms of oligos.** Clockwise from top left: phosphorothioate LNA antisense, phosphodiester LNA antisense, siRNA sense strand and siRNA antisense strand.
