# Supplementary material
Source: PubMed Central journal article supplement (PMC3242665)
Supplement: mt2011206x4.pdf [file mt2011206x4.pdf]

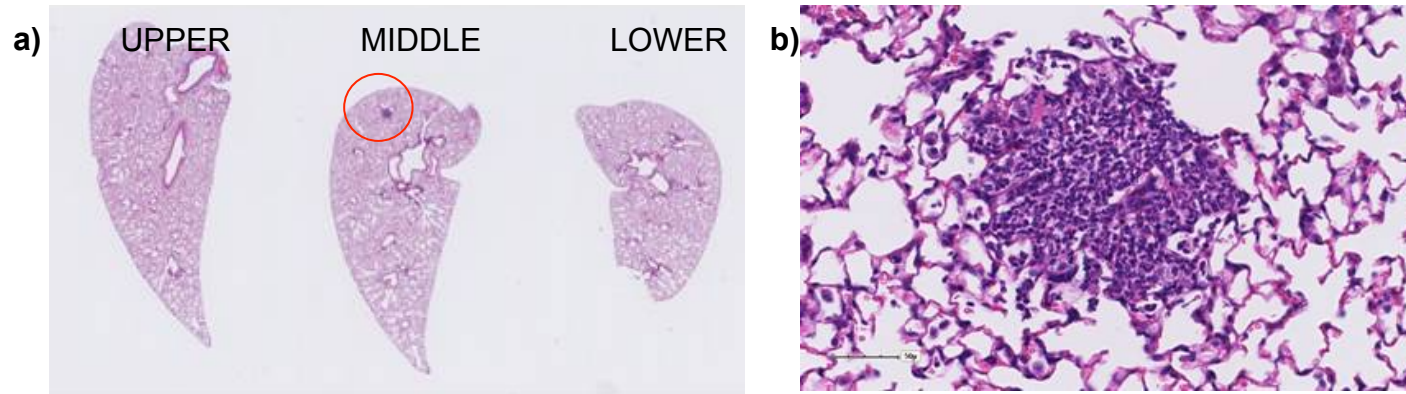

**Figure S4: Lung histology confirms lack of lymphocytic infiltrate as a consequence of intratracheal oligonucleotide administration.** (a-b) Examples of H&E stains of left mouse lung lobes 24 hrs after intratracheal administration of oligonucleotides. Magnification is at x125. (a) Upper, middle and lower sections of left lung lobes from phosphodiester LNA antisense-dosed mice. A single instance of neutrophilia/pneumonia was observed across the study (red circle) and interpreted as irrelevant to the procedures carried out. (b) Magnification of the single neutrophilic event observation at x200.
