# Supplementary material
Source: PubMed Central journal article supplement (PMC3242665)
Supplement: mt2011206x5.pdf [file mt2011206x5.pdf]

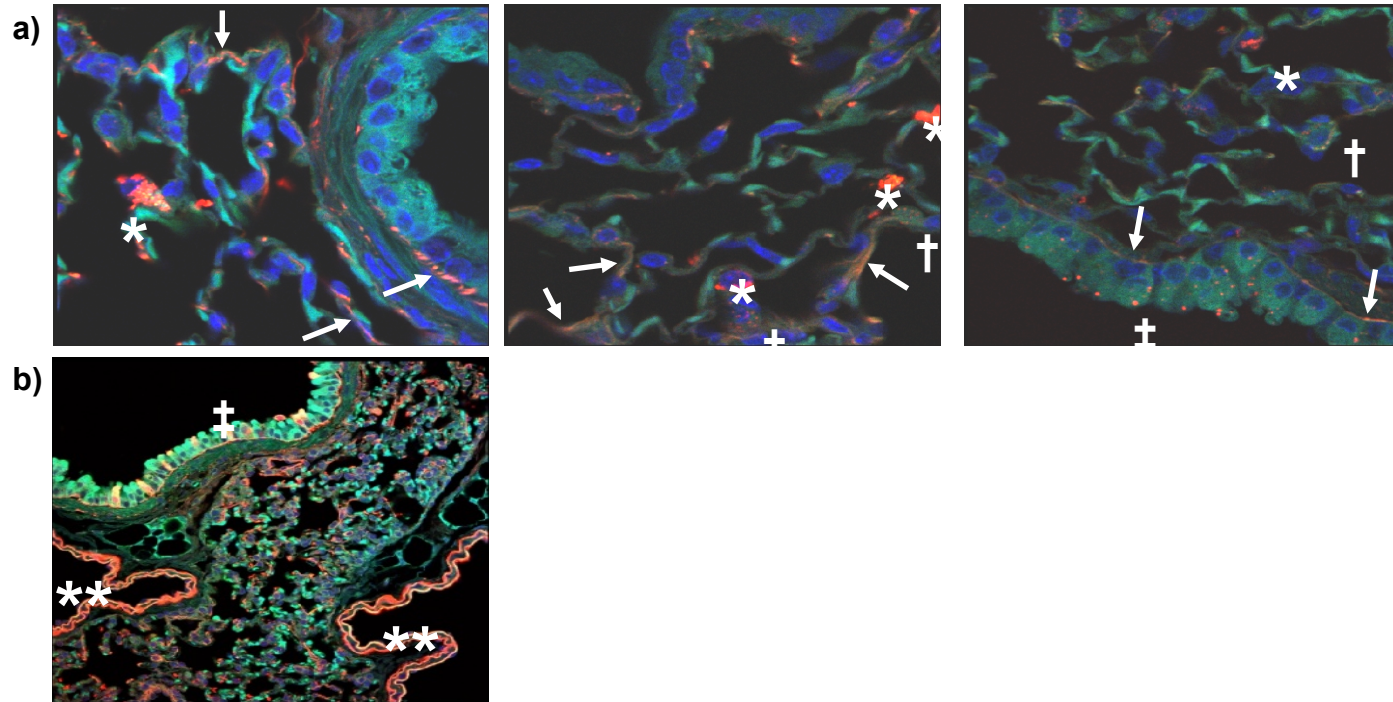

**Figure S5: Confocal imaging of intratracheally-administered phosphorothioate LNA antisense (PS-LNA) distribution in the mouse lung over time.** Substantial uptake of PS-LNA was documented across the mouse lung by 1 hour post-administration (a-c). Macrophages (\*) appeared to be primarily targeted. Alveolar cells with characteristic Type II epithelial shapes (†) also appeared to accumulate substantial quantities of punctate PS-LNA structures, as did bronchial epithelia (‡), though to a lesser extent. Plasma membrane spreading (white arrows) was also evident, particularly in alveolar epithelia and bronchial epithelia basal membranes. (b) By 24 hrs substantial accumulation on elastin fibers (\*\*), sub-bronchial membranes and scattered bronchial cells (‡) was evident.
