# Supplementary material
Source: PubMed Central journal article supplement (PMC3242665)
Supplement: mt2011206x6.pdf [file mt2011206x6.pdf]

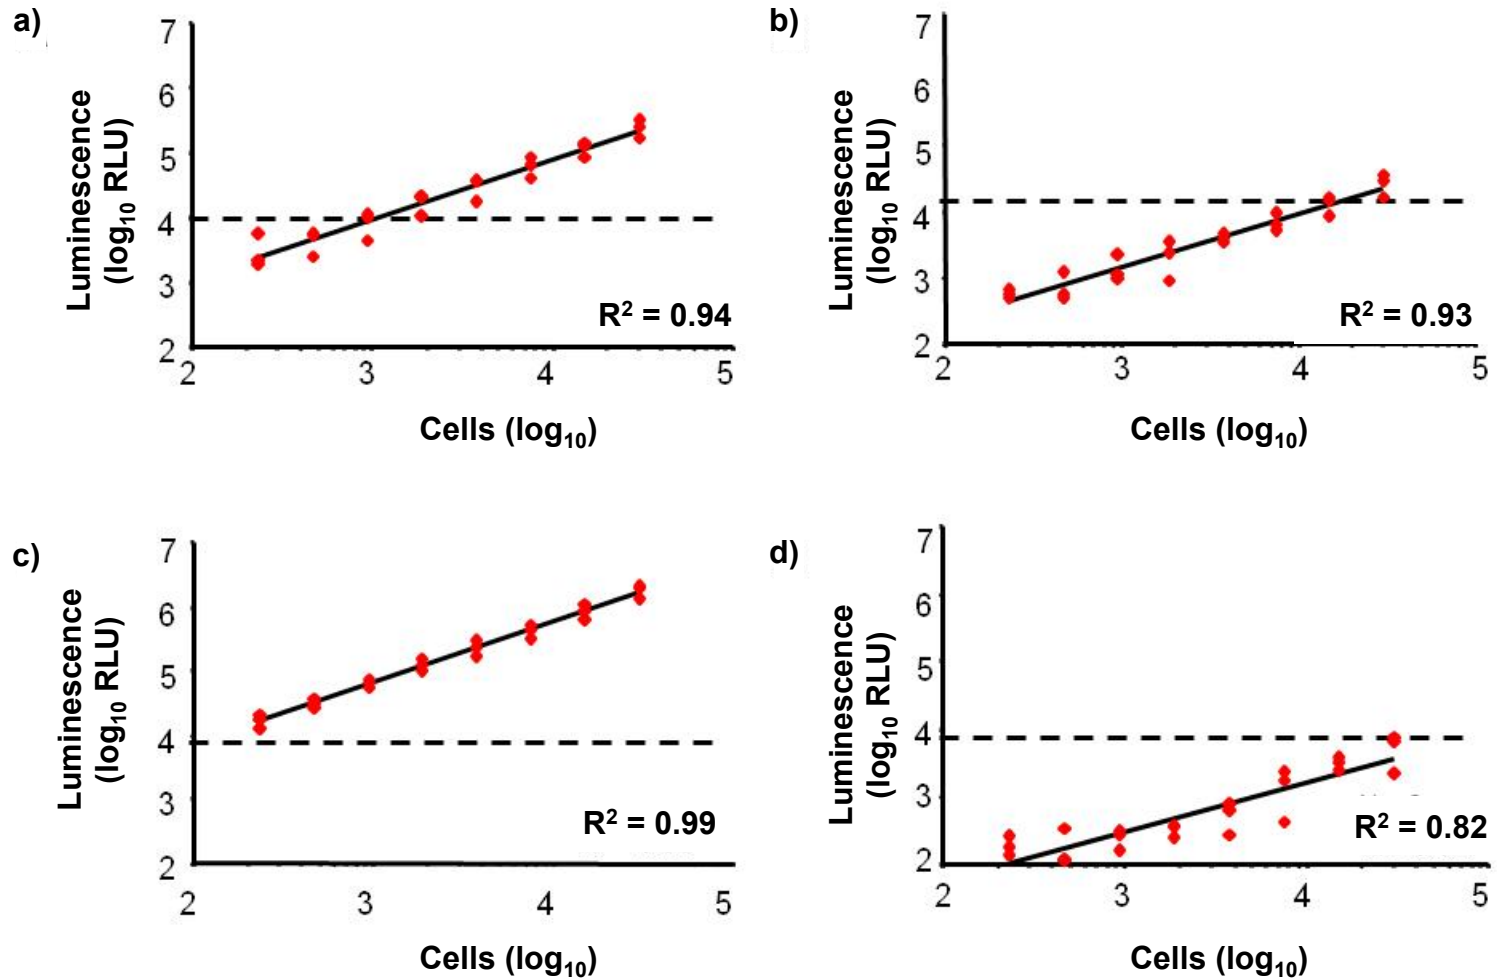

**Figure S6: Linearity of luminescence from beta-actin luciferase transgenic mouse lung cells *ex vivo*.** Regression analysis of cell number to luminescence intensity in FACS sorted (a) mixed (b) epithelial (c) macrophage and (d) non-epithelial, non-macrophage (other) cell populations from transgenic mice expressing luciferase under the control of a beta-actin promoter.
