# Supplementary material
Source: PubMed Central journal article supplement (PMC3242665)
Supplement: mt2011206x7.pdf [file mt2011206x7.pdf]

a)

|           | Charge state | Parent (m-z)/z | 3' N-1 | 3' N-2 | 3' N-3 |
|-----------|--------------|----------------|--------|--------|--------|
| Sense     | 1            | 6790.9         | 6470.9 | 6150.8 | 5821.8 |
|           | 6            | 1130.8         | 1077.5 | 1024.1 | 969.3  |
|           | 7            | 969.1          | 923.4  | 877.7  | 830.7  |
|           | 8            | 847.9          | 807.9  | 767.9  | 726.7  |
| Antisense | 1            | 6781.9         | 6461.8 | 6141.8 | 5836.8 |
|           | 6            | 1129.3         | 1076.0 | 1022.6 | 971.8  |
|           | 7            | 967.8          | 922.1  | 876.4  | 832.8  |
|           | 8            | 846.7          | 806.7  | 766.7  | 728.6  |

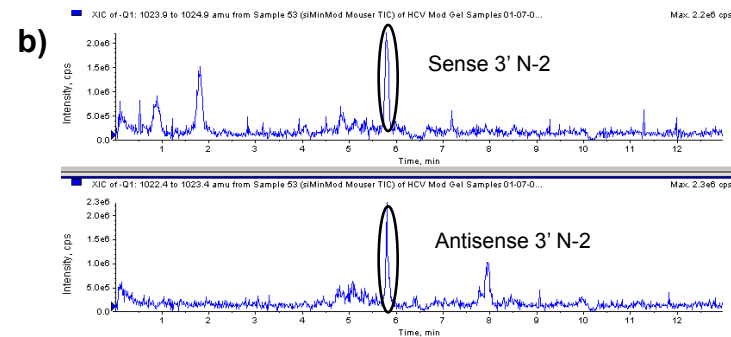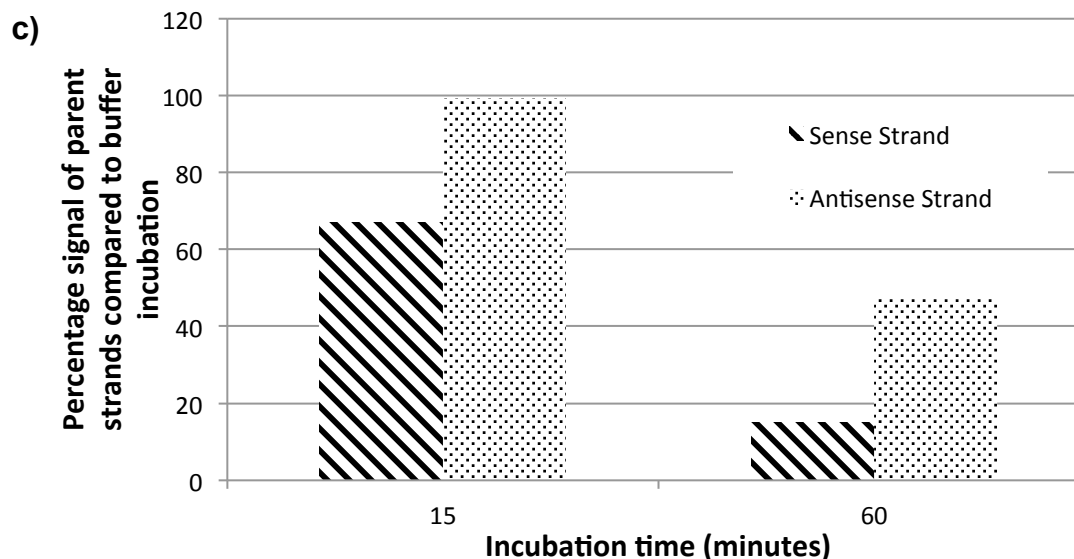

**Figure S7: Stability assessment of siRNA using LC-MS/MS.** (a) Table showing mass-charge transitions for sense and antisense parent strands, together with identified 3' metabolites (highlighted) after incubation in mouse plasma for 60 minutes. (b) Extracted ion chromatograms of the identified 3' N-2 metabolites. (c) Incubation of siRNA duplex in mouse plasma for 15 and 60 minutes shows more rapid 3' N-2 blunting on the sense strand compared to the antisense strand.
