# Supplementary material
Source: PubMed Central journal article supplement (PMC3242665)
Supplement: mt2011206x8.pdf [file mt2011206x8.pdf]

**Table S1:** Oligo detection by MS in urine samples

| <b>Sample</b>          | <b>Urine volume (uL)</b> | <b>Est Mass on column (ng)</b> |
|------------------------|--------------------------|--------------------------------|
| PS-LNA                 | 25                       | 8.9                            |
| PO-LNA                 | 25                       | 15.0                           |
| siRNA Antisense Strand | 5                        | 4.0                            |
